# Supplementary material for: TLR4-Mediated Pathway Triggers Interferon-Independent G0 Arrest and Antiviral SAMHD1 Activity in Macrophages
Source: PubMed Central journal article supplement (PMC7109521; doi:10.1016/j.celrep.2020.03.008), 2020-03-24

**Cell Reports, Volume 30**

**Supplemental Information**

**TLR4-Mediated Pathway**

**Triggers Interferon-Independent G0 Arrest**

**and Antiviral SAMHD1 Activity in Macrophages**

**Petra Mlcochova, Helena Winstone, Lorena Zuliani-Alvarez, and Ravindra K. Gupta**

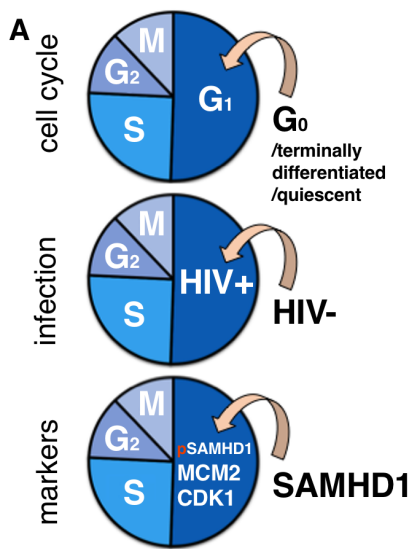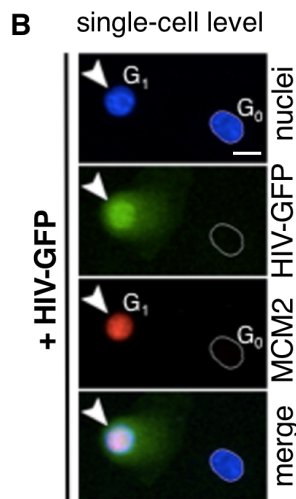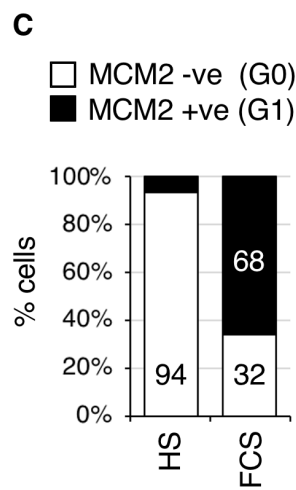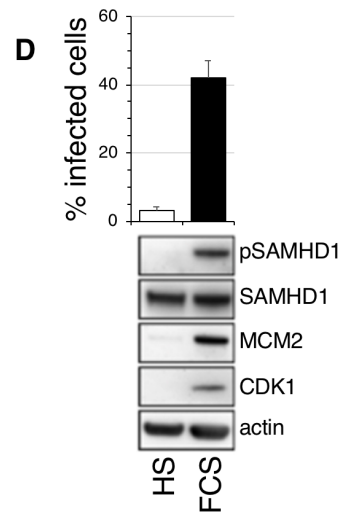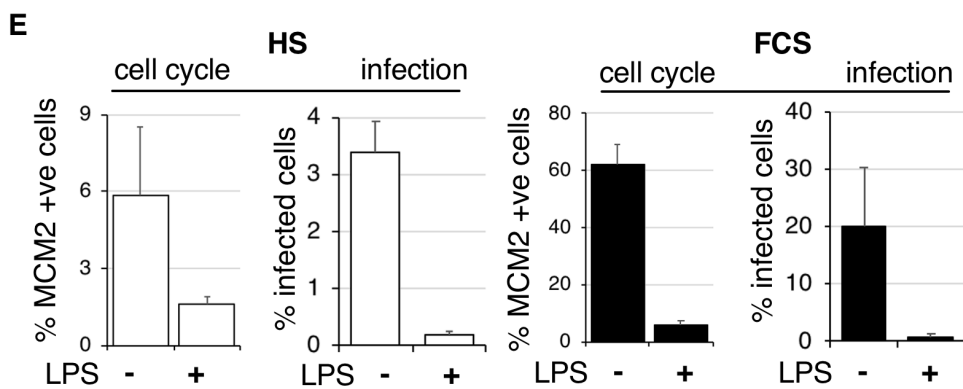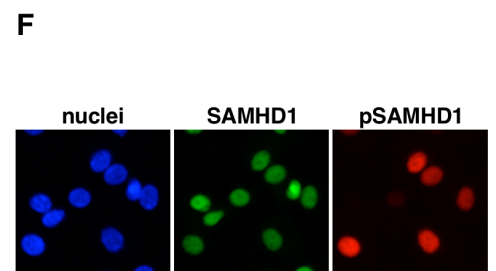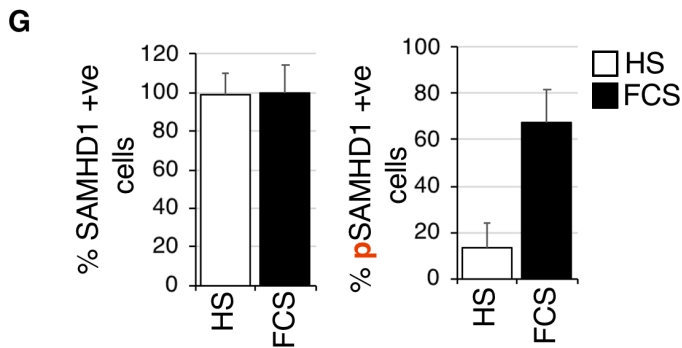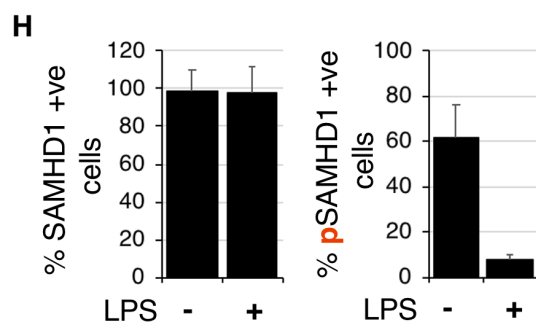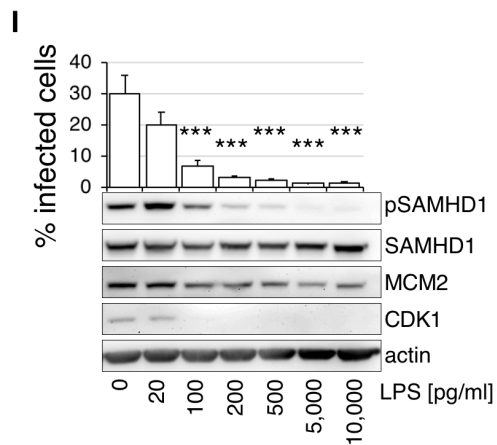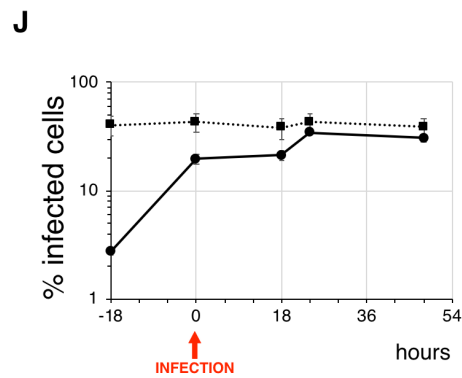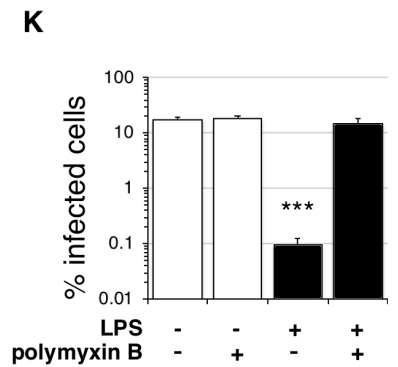

**Figure S1: HS and FCS differentiation protocol used to study TLR4 mediated block to HIV-1 infection. Related to Figure 1-4.** (A) Diagram of G<sub>0</sub> to G<sub>1</sub> transition in MDM based on our previous study in EMBO J (Mlcochova et al., 2017). MDM in G<sub>0</sub> are quiescent cells where SAMHD1 is dephosphorylated/active. G<sub>0</sub> cells are not permissive to HIV-1 infection. MDM after transition into G<sub>1</sub> phase are positive for MCM2 and CDK1, markers of cell cycle re-entry and G<sub>1</sub> phase. SAMHD1 is phosphorylated/inactive in G<sub>1</sub> cells and MDM are permissive to HIV-1 infection. (B) Example of single-cell analysis showing MDM in G<sub>0</sub> (negative for MCM2, non-infected) and G<sub>1</sub> phase (positive for MCM2, HIV-1 infected). In our experiments on average 10<sup>4</sup> cells are recorded and analysed using automated cell-imaging system Hermes WiScan and ImageJ. Scale bars, 20µm. (C,D) Quantification of cells in G<sub>0</sub> and G<sub>1</sub> phase. By simple culturing condition we can keep MDM in G<sub>0</sub> (by using Human Serum, HS) or induce G<sub>0</sub> to G<sub>1</sub> transition (by using Fetal Calf Serum, FCS). Quantification can be achieved at single cell level (B,C) or from cell lysates using immunoblot (D). (E) Cells cultured in HS (MDM mostly in G<sub>0</sub>) or FCS (MDM mostly in G<sub>1</sub>) were treated with LPS and infected by VSV-G pseudotyped HIV-1 18h later. The percentage of infected and MCM2 positive cells were determined 48h post-infection. (n = 3, mean ± s.e.m.; \*\*\*P-value ≤ 0.001, \*\*P-value ≤ 0.01, paired t-test). (F-H) Detection of pSAMHD1 at single-cell level. In our experiments on average 10<sup>4</sup> cells are recorded and analysed using automated cell-imaging system Hermes WiScan and ImageJ. (F) Representative example of immunofluorescence staining of MDM for total SAMHD1 and phosphorylated SAMHD1. Scale bars, 20µm. (G) Quantification of SAMHD1 and pSAMHD1 expression in HS and FCS cultured macrophages. (H) Quantification of SAMHD1 and pSAMHD1 expression in FCS cultured macrophages 18h after LPS treatment. (I-K) Cells were infected by VSV-G pseudotyped HIV-1 and the percentage of infected cells was determined 48h post-infection. (n=3, mean±SEM; \*\*\*P-value ≤ 0.001, paired t-test). (I) MDM were treated with increasing concentration of LPS 18h before infection. Cells from a representative donor were used for immunoblotting. (J) MDM were treated with LPS at different timepoints starting 18h before infection, at the time of infection and after infection. (K) MDM were treated with LPS +/- polymyxin B that blocks the biological effect of LPS.

**A**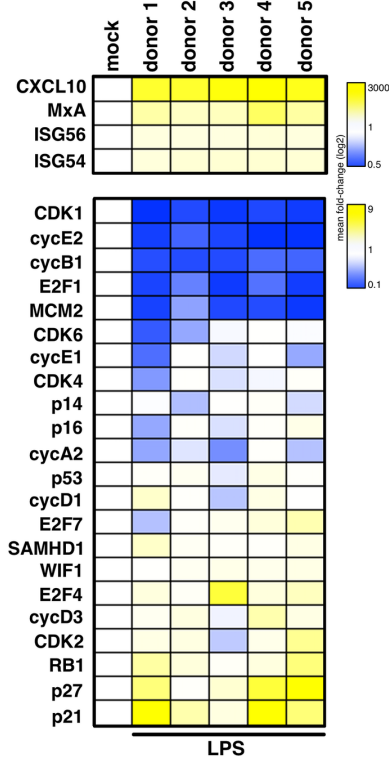**B**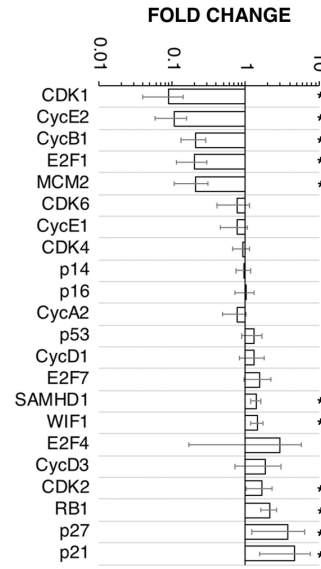**C**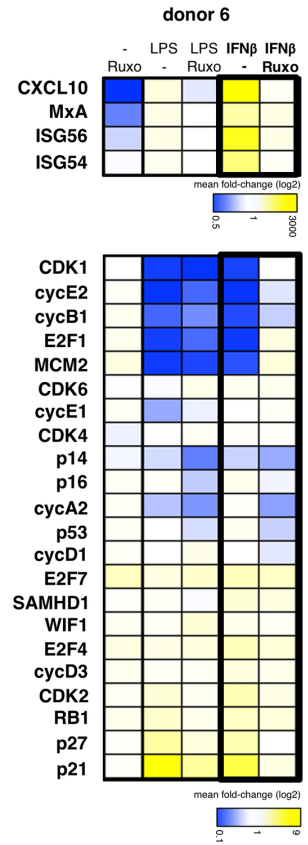**D**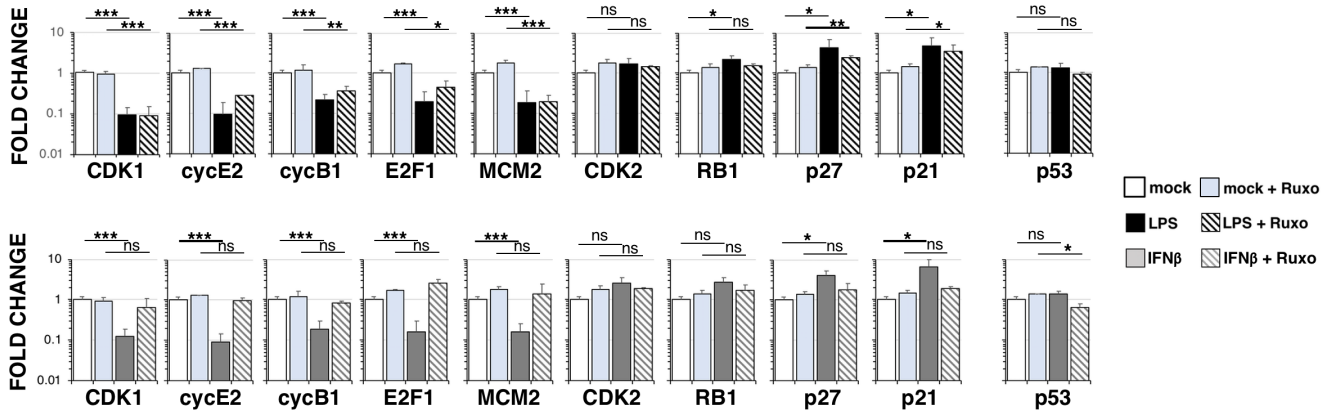**E**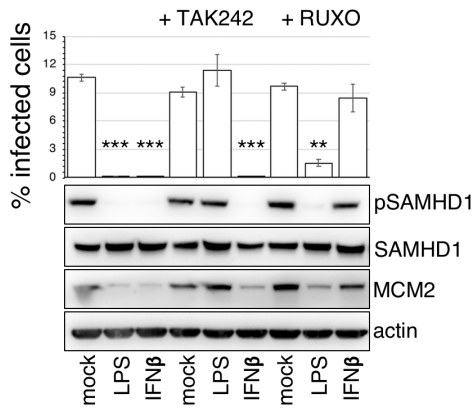**F**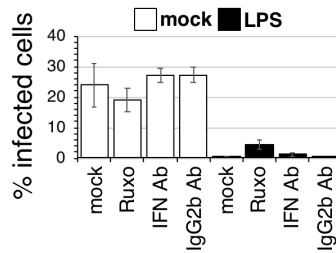

**Figure S2: IFN-independent and dependent G<sub>0</sub> arrest in human MDM. Related to Figure 3.** (A) A heat map depicting differential gene expression patterns of cell cycle associated transcripts in MDM from 5 different donors treated with LPS for 18h. The colour scale bar corresponds to log-fold expression. (B) Relative expression levels (fold change) of cell cycle associated transcripts. ( $n = 6$ , mean  $\pm$  SEM; \*\*\* $P$ -value  $\leq 0.001$ , \*\* $P$ -value  $\leq 0.01$ , \* $P$ -value  $\leq 0.1$ , paired  $t$ -test). (C) A heat map depicting differential gene expression patterns of cell cycle associated transcripts in MDM treated with LPS or IFN $\beta$  in the presence or absence of RUXO. The colour scale bar corresponds to log-fold expression. (D) Relative expression levels (fold changes) of statistically significantly changed cell cycle associated transcripts after LPS or IFN $\beta$  treatment in the presence or absence of RUXO. ( $n = 4$ , mean  $\pm$  s.e.m.; \*\*\* $P$ -value  $\leq 0.001$ , \*\* $P$ -value  $\leq 0.01$ , \* $P$ -value  $\leq 0.1$ , (ns) non-significant, paired  $t$ -test). (E) MDM were treated with TAK242 and RUXO 6h before addition of LPS and interferon b (IFN $\beta$ ). Cells were infected by VSV-G pseudotyped HIV-1 18h later. The percentage of infected cells was determined 48h post-infection. ( $n = 3$ , mean  $\pm$  s.e.m.; \*\*\* $P$ -value  $\leq 0.001$ , \*\* $P$ -value  $\leq 0.01$ , paired  $t$ -test). Cells from a representative donor were used for immunoblotting. (F) MDM were exposed to anti-IFN Ab/IgG2b non-specific Ab and treated with LPS. Cells were infected by VSV-G pseudotyped HIV-1 18h later. The percentage of infected cells was determined 48h post-infection. ( $n = 3$ , mean  $\pm$  s.e.m.; \*\*\* $P$ -value  $\leq 0.01$ , paired  $t$ -test).

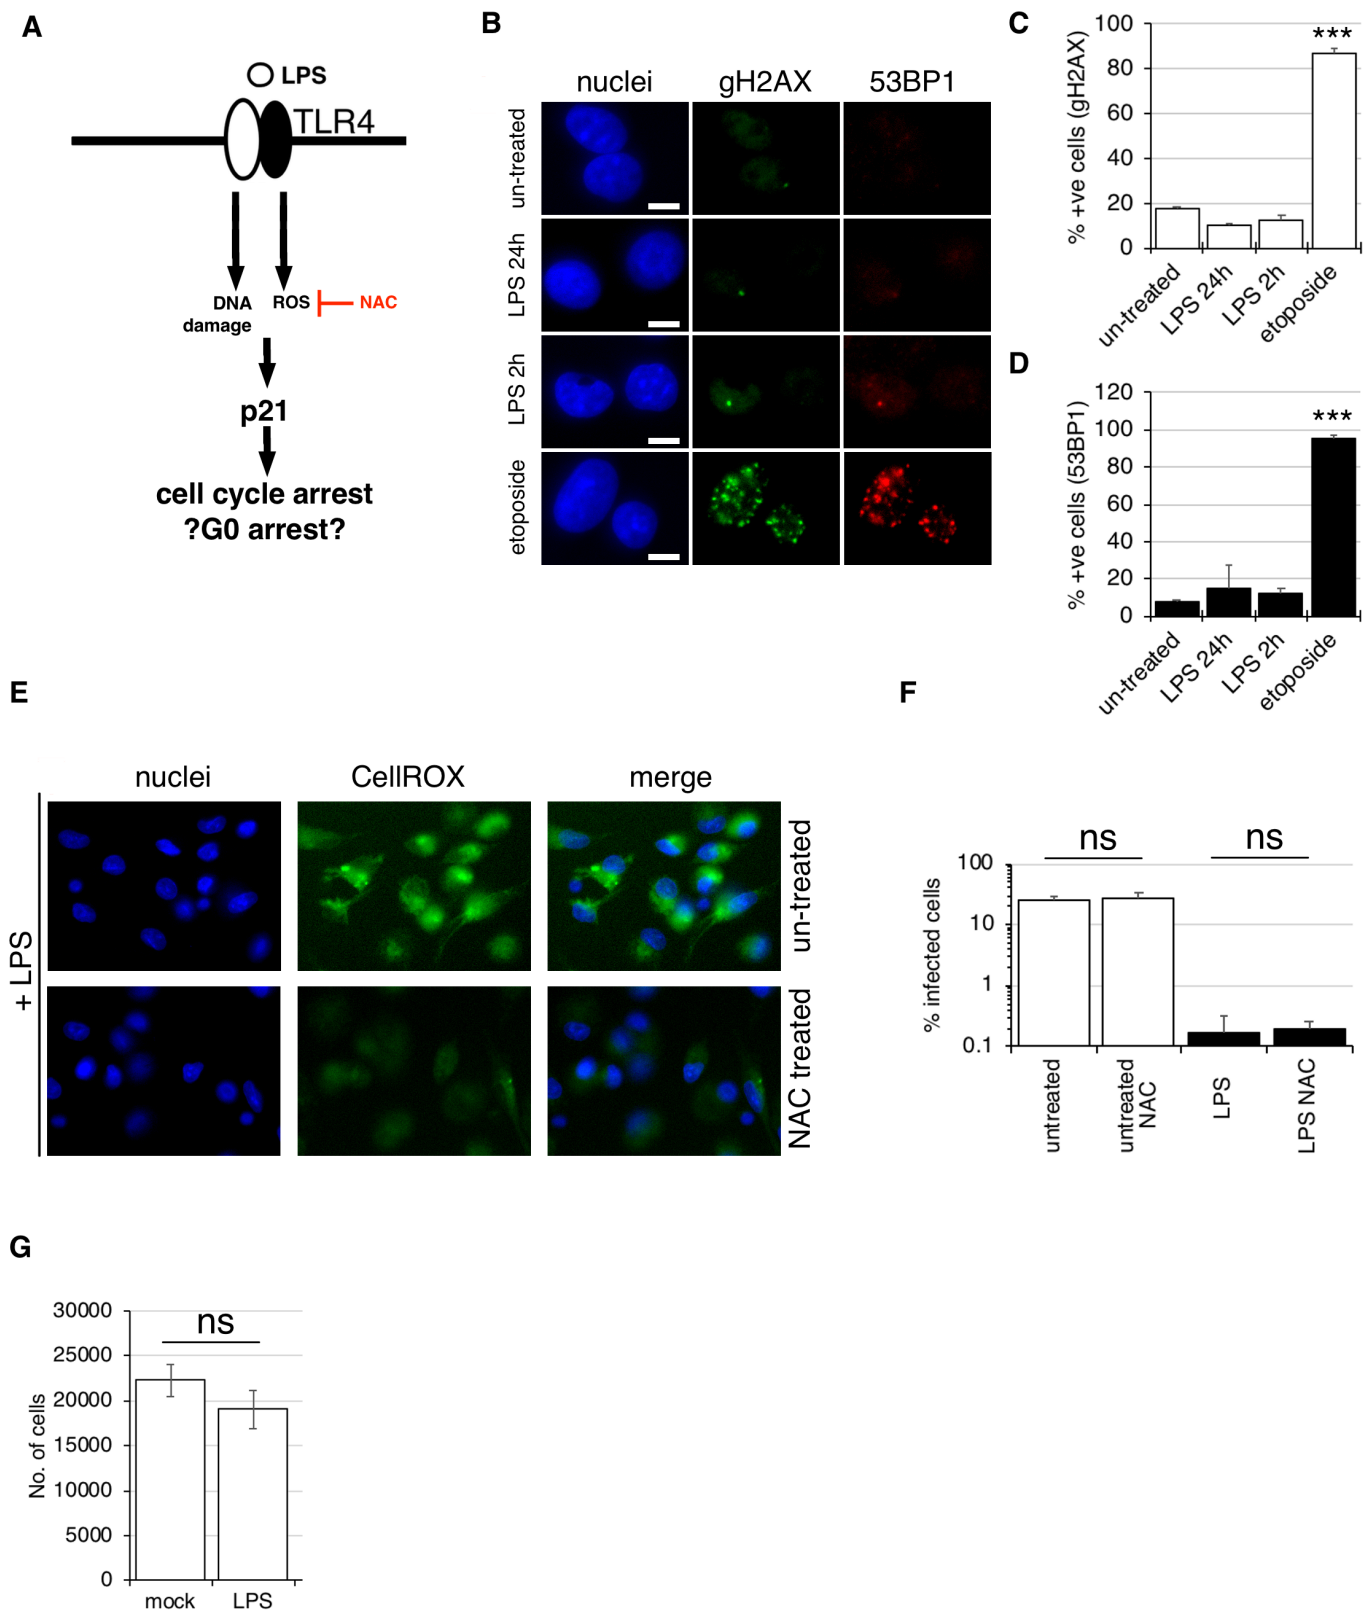

**Figure S3: DNA damage and ROS during LPS mediated TLR4 activation in human macrophages. Related to Figure 3.** (A) Simplified diagram of LPS activation triggering oxidative stress (ROS production) and DNA damage. ROS inhibitor N-acetyl-L-cysteine (NAC). (B) MDM were treated with LPS for 2 or 24h, or with Etoposide for 2h (positive control for DNA damage). Cells were fixed and stained for DNA damage foci positive for H2AX and 53BP1. (C,D) Quantification of (C) H2AX or (D) 53BP1 positive cells. 1,000 cells were acquired using Hermes WiScan automated cell-imaging system (IDEA Bio-Medical Ltd. Rehovot, Israel) and analysed using MetaMorph and ImageJ software. ( $n = 3$ , mean  $\pm$  SEM). \*\*\* $P$ -value  $\leq 0.01$ , paired  $t$ -test. (E) MDM were treated with LPS in the presence or absence of ROS inhibitor NAC and labelled with CellROX to detect ROS. (F) MDM were treated with LPS in the presence or absence of ROS inhibitor NAC 18h before infection. Cells were infected by VSV-G pseudotyped HIV-1 and % infected cells were determined 48h post-infection. ( $n = 3$ , mean  $\pm$  SEM). (ns) non-significant, paired  $t$ -test. (G) MDM treated or untreated with LPS were stained for nuclei using DAPI stain. Cell numbers were quantified using Hermes WiScan automated cell-imaging system (IDEA Bio-Medical Ltd. Rehovot, Israel), MetaMorph and ImageJ software ( $n = 7$ , mean  $\pm$  SEM). (ns) non-significant, paired  $t$ -test.

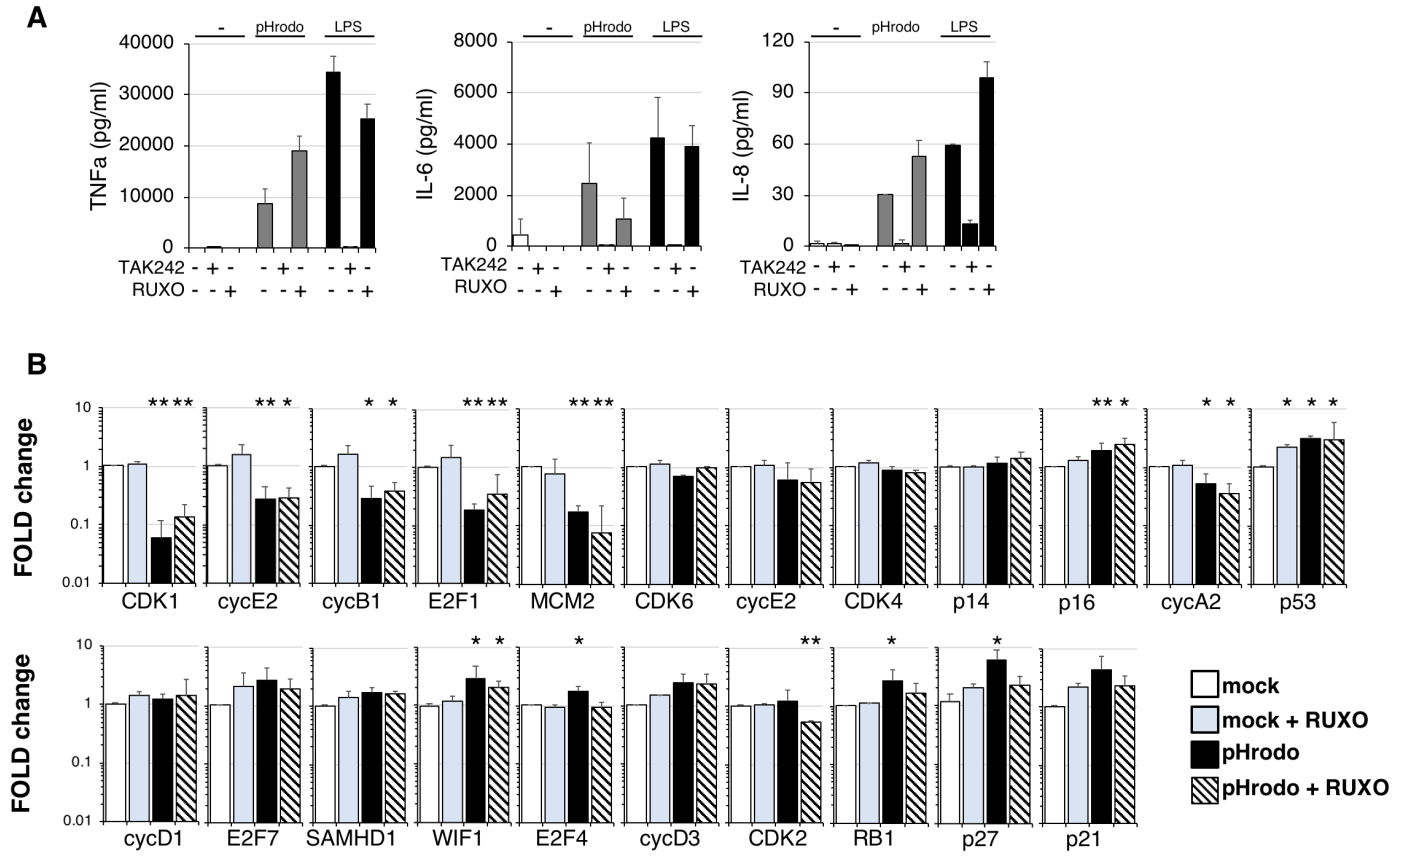

Supplement: mmc1.pdf [file mmc1.pdf]
